# Supplementary material for: DNA damage and expression of DNA methylation modulators in urine-derived cells of patients with hypertension and diabetes
Source: PubMed Central journal article supplement (PMC7042287; doi:10.1038/s41598-020-60420-9), 2020-02-25

**DNA damage and expression of DNA methylation modulators in urine-derived  
cells of patients with hypertension and diabetes**

**Supplementary information**

Akihito Hishikawa M.D., Ph.D.<sup>1</sup>, Kaori Hayashi M.D., Ph.D.<sup>1,\*</sup>, Norifumi Yoshimoto  
M.D.<sup>1</sup>, Ran Nakamichi M.D.<sup>1</sup>, Koichiro Homma M.D., Ph.D.,<sup>2</sup> Hiroshi Itoh M.D.,  
Ph.D.<sup>1</sup>

<sup>1</sup> Division of Nephrology, Endocrinology and Metabolism, Department of Internal  
Medicine, Keio University School of Medicine, Tokyo, Japan.

<sup>2</sup>Department of Emergency Medicine, School of Medicine, Keio University, Tokyo,  
Japan.

Correspondence to:

Kaori Hayashi, M.D., Ph.D.

Division of Nephrology, Endocrinology and Metabolism, Department of Internal  
Medicine, Keio University School of Medicine

35 Shinanomachi, Shinjuku-ku, Tokyo 160-8582, Japan

Tel: 81-3-5363-3796, Fax: 81-3-3359-2745

Email: [kaorihayashi@keio.jp](mailto:kaorihayashi@keio.jp)

## SUPPLEMENTARY TABLES

**Supplementary Table 1. Detection percent of the cell markers and epigenetic modifiers.**

|         | Total    | Group A<br>HT(-) DM(-) | Group B<br>HT(+) DM(-) | Group C<br>HT(+) DM(+) | p value<br>A vs B | p value<br>B vs C | p value<br>A vs C |
|---------|----------|------------------------|------------------------|------------------------|-------------------|-------------------|-------------------|
| N (%)   | 75 (100) | 19 (25)                | 41(55)                 | 15 (20)                |                   |                   |                   |
| Nephrin | 37 (49)  | 17 (89)                | 15 (37)                | 5 (33)                 | <b>0.0001</b>     | 0.8220            | <b>0.0007</b>     |
| AQP1    | 50 (67)  | 17 (89)                | 22 (54)                | 11 (73)                | <b>0.0068</b>     | 0.1851            | 0.2203            |
| AQP2    | 49 (65)  | 17 (89)                | 22 (54)                | 10 (67)                | <b>0.0068</b>     | 0.3837            | 0.1025            |
| KRT20   | 55 (73)  | 17 (89)                | 27 (66)                | 11 (73)                | 0.0543            | 0.5956            | 0.2203            |
| KAT5    | 43 (57)  | 19 (100)               | 14 (34)                | 10 (67)                | <b>&lt;0.0001</b> | <b>0.0294</b>     | <b>0.0064</b>     |
| DNMT1   | 75 (100) | 19 (100)               | 41 (100)               | 15 (100)               | n/a               | n/a               | n/a               |
| DNMT3A  | 75 (100) | 19 (100)               | 41 (100)               | 15 (100)               | n/a               | n/a               | n/a               |
| DNMT3B  | 75 (100) | 19 (100)               | 41 (100)               | 15 (100)               | n/a               | n/a               | n/a               |
| TET1    | 75 (100) | 19 (100)               | 41 (100)               | 15 (100)               | n/a               | n/a               | n/a               |
| TET2    | 41 (55)  | 17 (89)                | 17 (41)                | 7 (47)                 | <b>0.0005</b>     | 0.7275            | <b>0.0065</b>     |
| TET3    | 75 (100) | 19 (100)               | 41 (100)               | 15 (100)               | n/a               | n/a               | n/a               |
| SGLT2   | 75 (100) | 19 (100)               | 41 (100)               | 15 (100)               | n/a               | n/a               | n/a               |

**Supplementary Table 2. Sequence of Real-time PCR primers**

| <b>Name</b> | <b>F/R</b> | <b>Sequence</b>           |
|-------------|------------|---------------------------|
| GAPDH       | F          | TGATGACATCAAGAAGGTGG      |
|             | R          | TTTCTTACTCCTTGGAGGCC      |
| nephrin     | F          | TGGCGATTCCCTGCCTCCGTT     |
|             | R          | TTCTGCTGGGAGCCCTCGTT      |
| AQP1        | F          | CTGGGCATCGAGATCATCGG      |
|             | R          | ATCCCACAGCCAGTGTAGTCA     |
| AQP2        | F          | GCTCCGCTCCATAGCCTTC       |
|             | R          | GGGTGCCAATACCCAAGCC       |
| KRT20       | F          | GGACGACACCCAGCGTTTAT      |
|             | R          | CGCTCCCATAGTTCACCGTG      |
| KAT5        | F          | GGGGAGATAATCGAGGGCTG      |
|             | R          | TCCAGACGTTTGTGTAAGTCAAT   |
| DNMT1       | F          | CAAACCCCTTCCAAACCTC       |
|             | R          | TAATCCTGGGGCTAGGTGAA      |
| DNMT3A      | F          | CCTGAAGCCTCAAGAGCAGT      |
|             | R          | TGGTCTCCTTCTGTTCTTTGC     |
| DNMT3B      | F          | GGAAATTAGAATCAAGGAAATACGA |
|             | R          | AATTTGTCTTGAGGCGCTTG      |
| TET1        | F          | TCTGTTGTTGTGCCTCTGGA      |
|             | R          | GCCTTTAAACTTTGGGCTTC      |
| TET2        | F          | ACGCTTGGAAGCAGGAGAT       |
|             | R          | AAGGCTGCCCTCTAGTTGAA      |
| TET3        | F          | CGCCTCTATCCGGAACCT        |
|             | R          | TCCCCGTGTAGATGACCTTC      |
| SGLT2       | F          | ACACGGTACAGACCTTCGTCA     |
|             | R          | GCTGCTCCCAGGTATTTGTC      |

**Supplementary Table 3. Gene-specific primer pairs used for quantitative long-distance PCR**

| <b>Name</b> | <b>F/R</b> | <b>Sequence</b>        |
|-------------|------------|------------------------|
| GAPDH       | F          | GCCCTCAACGACCACTTTGT   |
|             | R          | GCCAGACCCTGCACTTTTAAAG |
| nephrin     | F          | CTGCCATCAGCAACTCTCCA   |
|             | R          | CTCTGCCTCTGTTGTGCTGA   |
| AQP1        | F          | TCAATGCAGGGCTGGGTTAG   |
|             | R          | ACCCCGTTGGACAGGTTTTT   |
| SGLT2       | F          | GGACTGTGCTAGCTGAAGGG   |
|             | R          | AACGCAGTTGGTCTTAGGCA   |

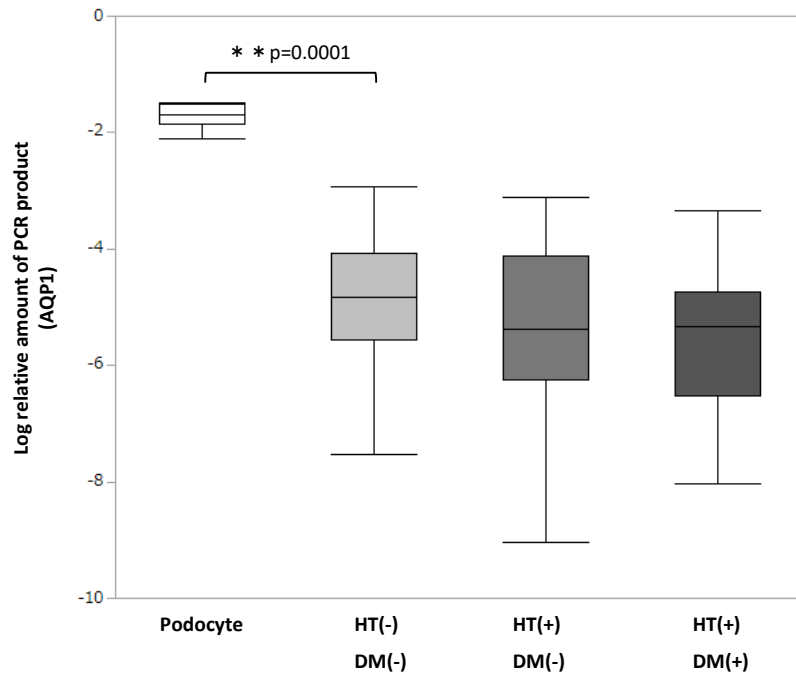

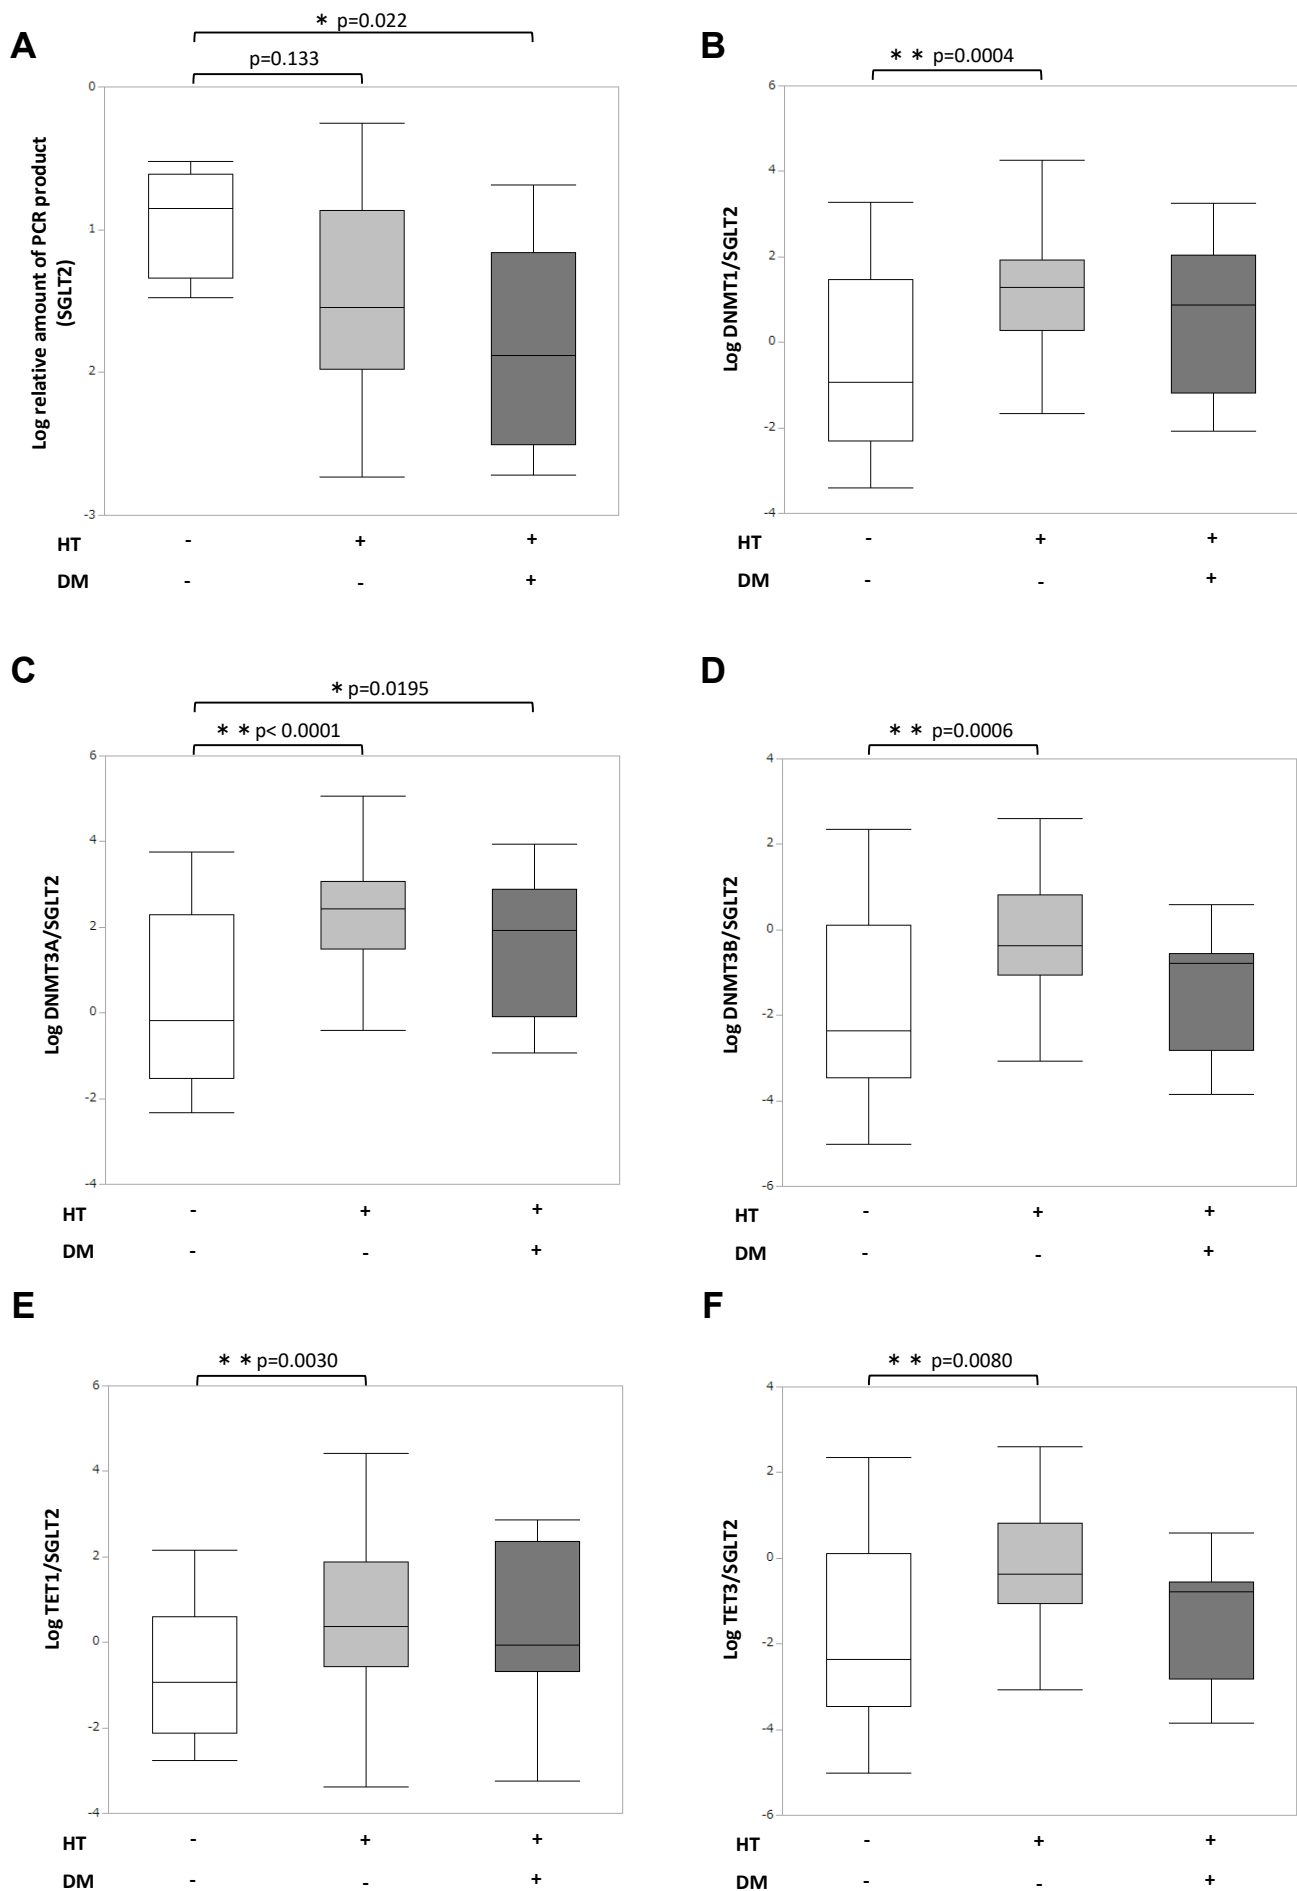

**A**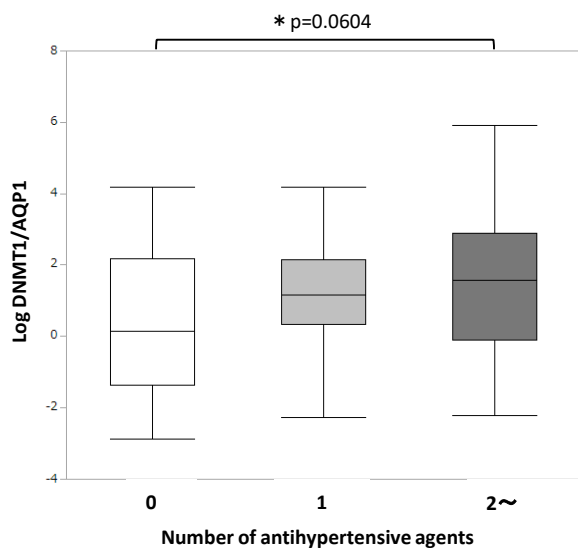**B**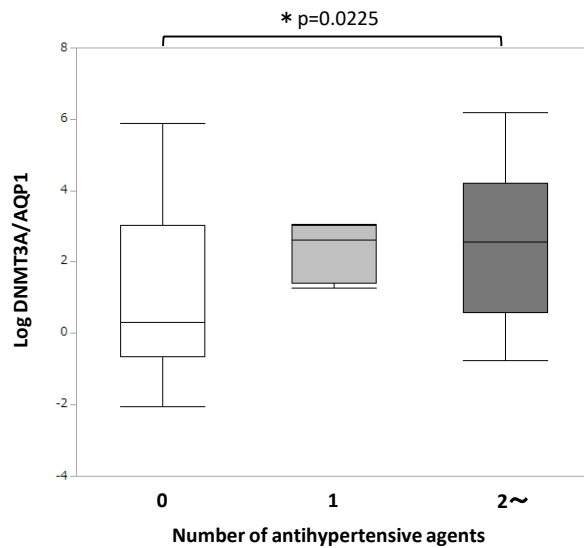**C**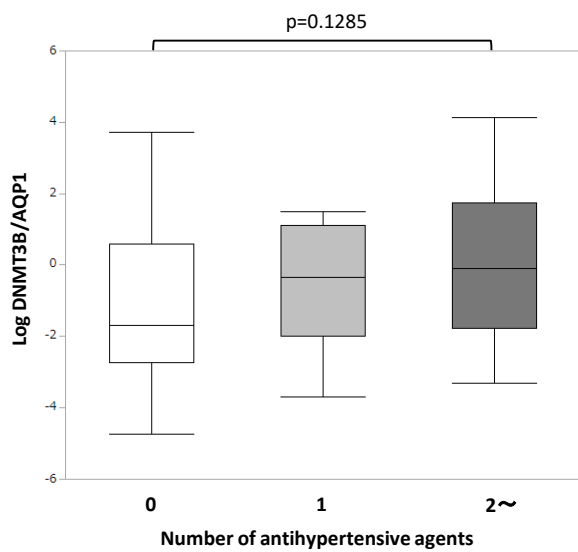**D**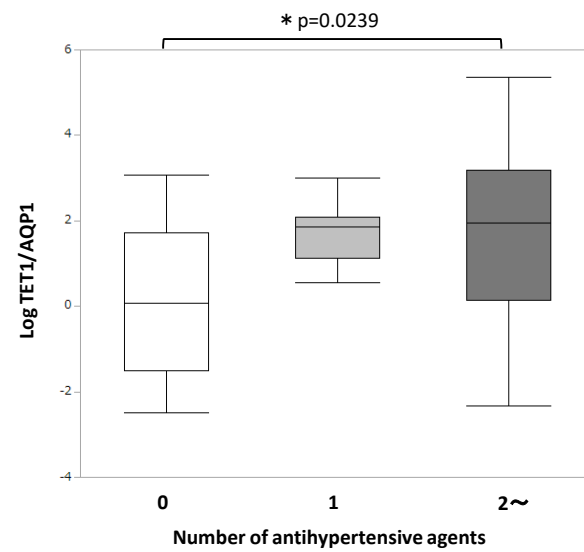**E**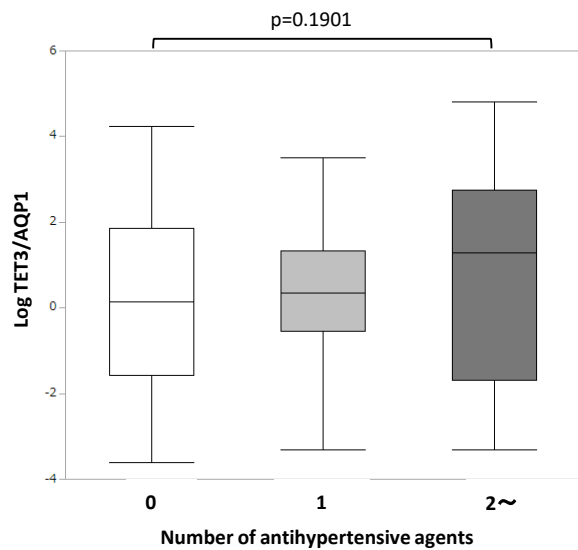

Supplement: 41598_2020_60420_MOESM1_ESM.pdf [file 41598_2020_60420_MOESM1_ESM.pdf]
